# Supplementary material for: NO-binding in {Ru(NO)2}8-type [Ru(NO)2(PR3)2X]BF4 compounds
Source: Royal Society of Chemistry journal article supplement (doi:10.1039/c4dt01506a), 2014-01-01
Supplement: c4dt01506a1.pdf [file c4dt01506a1.pdf]

## SUPPLEMENTARY INFORMATION

### **NO-binding in {Ru(NO)<sub>2</sub>}<sup>8</sup>-type [Ru(NO)<sub>2</sub>(PR<sub>3</sub>)<sub>2</sub>X]BF<sub>4</sub> compounds**

Anna K.E. Gallien<sup>a</sup>, Dominik Schaniel<sup>\*b</sup> and Theo Woike<sup>b</sup>, Peter Klüfers<sup>\*a</sup>

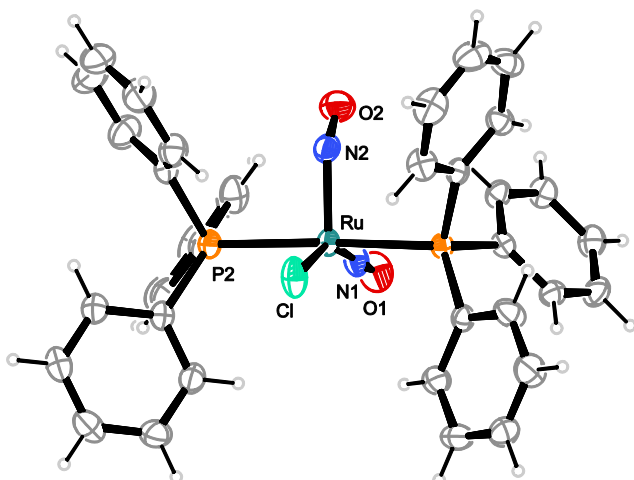

**Fig. 5 (extended)** Structure of the vOC-5-type complex cation in crystals of  $[\text{RuCl}(\text{NO})_2(\text{PPh}_3)_2]\text{BF}_4$  (**1**). Interatomic distances (Å) and angles (°): Ru–N1 1.746(2), Ru–N2 1.872(2), Ru–P1 2.4470(6), Ru–P2 2.4534(6), Ru–Cl 2.3523(6), O1–N1 1.155(3), O2–N2 1.162(3); O1–N1–Ru 178.9(2), O2–N2–Ru 134.78(19), N1–Ru–Cl 151.17(7), N1–Ru–P1 92.87(7), N1–Ru–P2 92.99(7), N1–Ru–N2 102.67(10), N2–Ru–Cl 106.14(7), N2–Ru–P1 92.21(6), N2–Ru–P2 90.15(6), Cl–Ru–P1 85.13(2), Cl–Ru–P2 87.93(2), P1–Ru–P2 173.05(2).

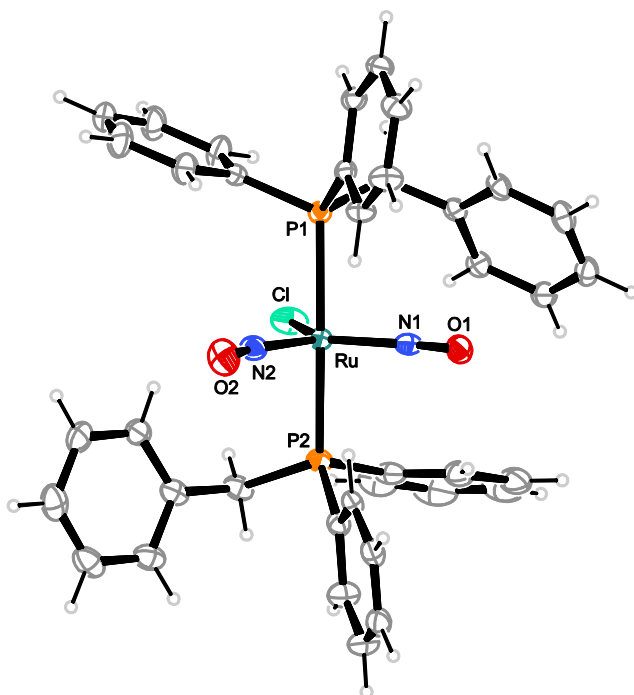

**Fig. 6 (extended):** Structure of the TBPY-5-type complex cation  $[\text{RuCl}(\text{NO})_2(\text{PPh}_2\text{Bn})_2]^+$  in crystals of **3**. The thermal ellipsoids are drawn at 50% probability level. Interatomic distances (Å) and angles (°), the standard deviation of the last decimal place is given in parentheses: Ru–N1 1.781(2), Ru–N2 1.785(2), Ru–Cl 2.4122(7), Ru–P1 2.4110(7), Ru–P2 2.4168(7), O1–N1 1.156(3), O2–N2 1.145(3); O1–N1–Ru 167.2(2), O2–N2–Ru 164.0(2), N1–Ru–Cl 124.14(8), N1–Ru–P1 93.41(7), N1–Ru–P2 92.88(7), N1–Ru–N2 115.52(11), N2–Ru–Cl 120.34(8), N2–Ru–P1 95.58(7), N2–Ru–P2 95.83(7), Cl–Ru–P1 81.63(2), Cl–Ru–P2 81.85(2), P1–Ru–P2 163.10(2).

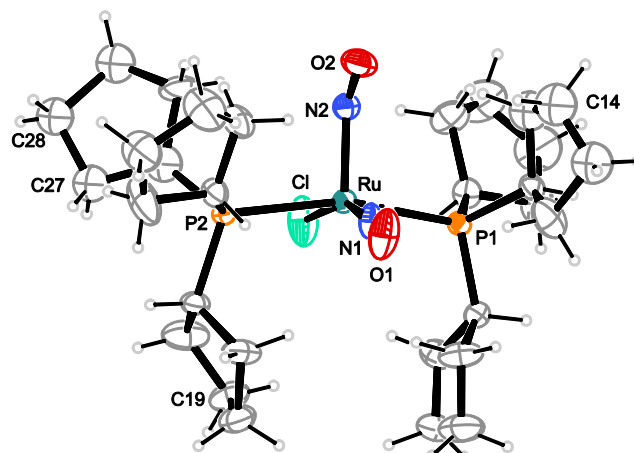

**Fig. 7 (extended)** Structure of the vOC-5-type complex cation  $[\text{RuCl}(\text{NO})_2(\text{PCyp}_3)_2]^+$  in crystals of **8a**. The thermal ellipsoids are drawn at 40% probability level. Some carbon atoms are disordered. The minor parts of C14 (44%), C19 (42%) and C27 and C28 (47%) are not shown. Interatomic distances (Å) and angles (°), the standard deviation of the last decimal place is given in parentheses: Ru–N1 1.758(3), Ru–N2 1.850(4), Ru–Cl 2.3523(16), Ru–P1 2.4569(16), Ru–P2 2.4729(15), O1–N1 1.128(5), O2–N2 1.157(5), O1–N1–Ru 176.9(4), O2–N2–Ru 137.0(4), N1–Ru–N2 103.5(2), N1–Ru–Cl 157.42(15), N1–Ru–P1 92.77(13), N1–Ru–P2 90.01(13), N2–Ru–Cl 98.93(14), N2–Ru–P1 98.35(13), N2–Ru–P2 97.42(13), Cl–Ru–P1 86.20(6), Cl–Ru–P2 84.78(6), P1–Ru–P2 162.87(4). C13–15 and C26–29 were refined isotropically.

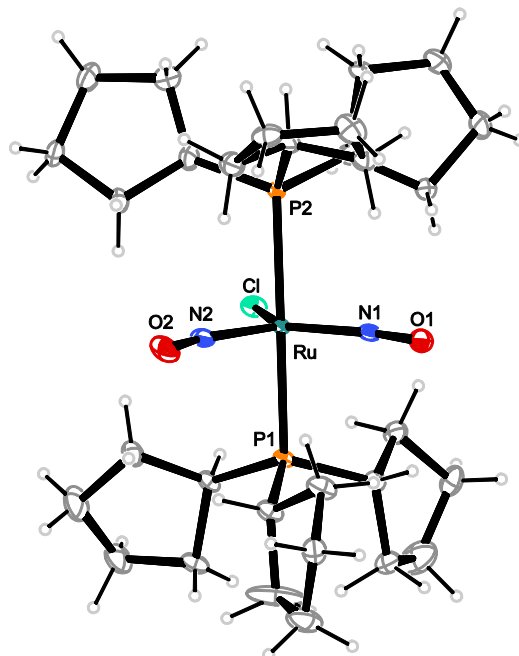

**Fig. 8 (extended)** Structure of the TBPY-5-type complex cation  $[\text{RuCl}(\text{NO})_2(\text{PCyp}_3)_2]^+$  in crystals of **8b**. The thermal ellipsoids are drawn at 50% probability level. Interatomic distances (Å) and angles (°), the standard deviation of the last decimal place is given in parentheses: Ru–N1 1.775(2), Ru–N2 1.783(2), Ru–Cl 2.4185(7), Ru–P1 2.4470(7), Ru–P2 2.4480(7), O1–N1 1.154(3), O2–N2 1.153(3), O1–N1–Ru 168.1(2), O2–N2–Ru 164.4(2), N1–Ru–Cl 126.35(8), N1–Ru–P1 89.93(7), N1–Ru–P2 95.83(7), N1–Ru–N2 117.02(11), N2–Ru–Cl 116.60(8), N2–Ru–P1 91.74(7),

N2–Ru–P2 96.04(7), Cl–Ru–P1 86.72(2), Cl–Ru–P2 80.42(2), P1–Ru–P2 166.94(2).

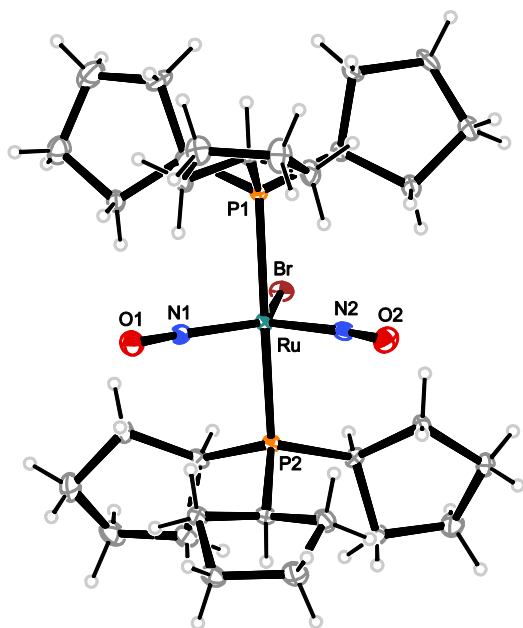

**Fig. 9 (extended)** Structure of the *TBPY*-5-type complex cation  $[\text{RuBr}(\text{NO})_2(\text{PCyp}_3)_2]^+$  in crystals of **9**. The thermal ellipsoids are drawn at 50% probability level. Interatomic distances (Å) and angles (°), the standard deviation of the last decimal place is given in parentheses: Ru–N1 1.779(3), Ru–N2 1.780(3), Ru–Br 2.5734(5), Ru–P1 2.4438(10), Ru–P2 2.4479(10), O1–N1 1.164(4), O2–N2 1.162(4), O1–N1–Ru 168.7(3), O2–N2–Ru 166.6(3), N1–Ru–Br 124.57(11), N1–Ru–P1 93.11(10), N1–Ru–P2 95.01(10), N1–Ru–N2 118.83(15), N2–Ru–Br 116.60(10), N2–Ru–P1 95.05(10), N2–Ru–P2 93.95(10), Br–Ru–P1 81.95(3), Br–Ru–P2 81.26(3), P1–Ru–P2 163.12(4).

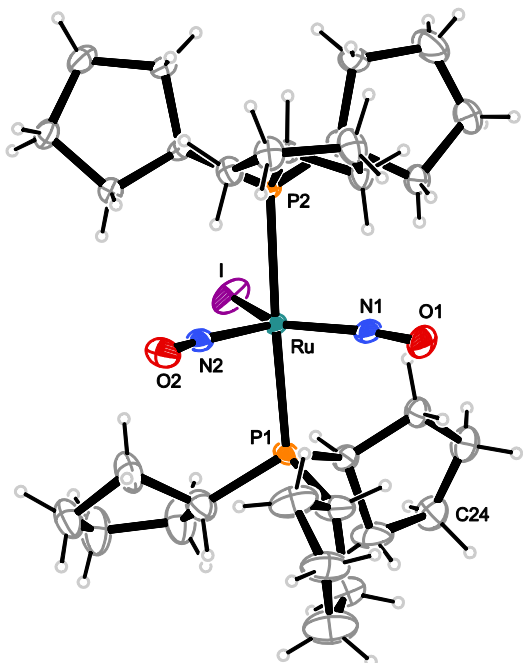

**Fig. 12:** Structure of the *TBPY*-5-type complex cation  $[\text{RuI}(\text{NO})_2(\text{PCyp}_3)_2]^+$  in crystals of **10**. The thermal ellipsoids are drawn at 50% probability level. C24 is disordered, the minor part (34%) is not shown. Interatomic distances (Å) and angles (°), the standard deviation of the last decimal place is given in parentheses: Ru–N1 1.779(4), Ru–N2 1.787(4), Ru–I 2.7301(5), Ru–P1 2.4584(11), Ru–P2 2.4583(11), O1–N1 1.148(5), O2–N2 1.152(5), O1–N1–Ru 168.9(4), O2–N2–Ru 165.5(4), N1–Ru–I 128.30(14), N1–Ru–P1 88.00(12), N1–Ru–P2 94.51(12), N1–Ru–

N2 118.45(19), N2–Ru–I 113.18(13), N2–Ru–P1 95.78(12), N2–Ru–P2 94.14(12), I–Ru–P1 84.35(3), I–Ru–P2 84.18(3), P1–Ru–P2 167.10(4).

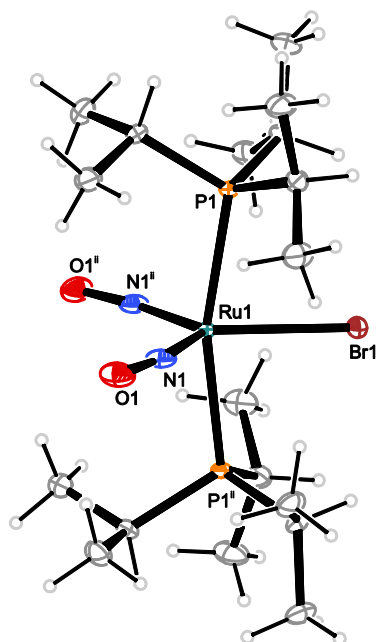

**Fig. 11 (extended)** Structure of the *TBPY*-5-type conformer **12b** of the complex cation  $[\text{RuBr}(\text{NO})_2(\text{P}^i\text{Pr}_3)_2]^+$  in crystals of **12**. The thermal ellipsoids are drawn at 50% probability level. Interatomic distances (Å) and angles (°), the standard deviation of the last decimal place is given in parentheses: Ru–N1 1.785(3), Ru–Br 2.5502(6), Ru–P1 2.4592(8), O1–N1 1.138(4), O1–N1–Ru 165.34(3), N1–Ru–Br 123.54(10), N1–Ru–P1 93.18(9), N1–Ru–P1<sup>ii</sup> 95.19(9), N1–Ru–N1<sup>ii</sup> 112.9(2), Br–Ru–P1 82.41(2), P1–Ru–P1<sup>ii</sup> 164.82(4). Selected torsion angles: N1<sup>ii</sup>–Ru1–N1–O1 4(1), Br1–Ru1–N1–O1 –176(1). Symmetry code: <sup>ii</sup> –x + 1, y, –z + ½.

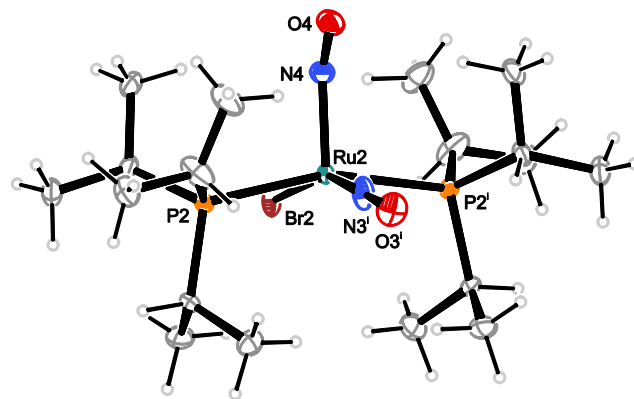

**Fig. 12 (extended)** Structure of the *vOC*-5-type conformer **12a** of the complex cation  $[\text{RuBr}(\text{NO})_2(\text{P}^i\text{Pr}_3)_2]^+$  in crystals of **12**. The thermal ellipsoids are drawn at 50% probability level. Interatomic distances (Å) and angles (°), the standard deviation of the last decimal place is given in parentheses: Ru2–N3 1.72(1), Ru2–N4 1.860(5), Ru2–Br 2.4606(17), Ru2–P2 2.4705(9), O3–N3 1.22(1), O4–N4 1.060(6); O3–N3–Ru2 177(1), O4–N4–Ru2 150.8(3), N4–Ru2–Br 103.34(5), N4–Ru2–P2 99.14(2), N4–Ru2–N3 100.1(3), N3–Ru2–Br 156.5(3), N3–Ru2–P2 88.5(3), Br2–Ru–P2 89.16(4), P1–Ru–P2 161.72(4). Selected torsion angles: N3–Ru2–N4–O4 –2.1(7), Br2–Ru2–N4–O4 176.5(7). Symmetry code: <sup>i</sup> –x, y, –z + ½. The Ru–N distances and RuNO angles as well as the Ru–Br distance have to be viewed with caution, since the linear NO group and the Br ligand are disordered in such a way as to be superimposed onto each other. The bent NO group is also disordered in such a way to ensure that the O4 atom is always inclined to the linear NO group. This kind of disorder corresponds to crystallographic

*mm2* site symmetry of the cations.

Figures S1–S6 show the structures of the complex cations of **2**, **4**, **5**, **6**, **7** and **11**. Tables 2 and 5 enlist the crystallographic data for the measurements of **3** and **9** at different temperatures, performed for the investigation of the temperature dependence of the atomic displacement parameters. Tables 1, 3, 4 and 6 enlist crystallographic data for **1–12**.

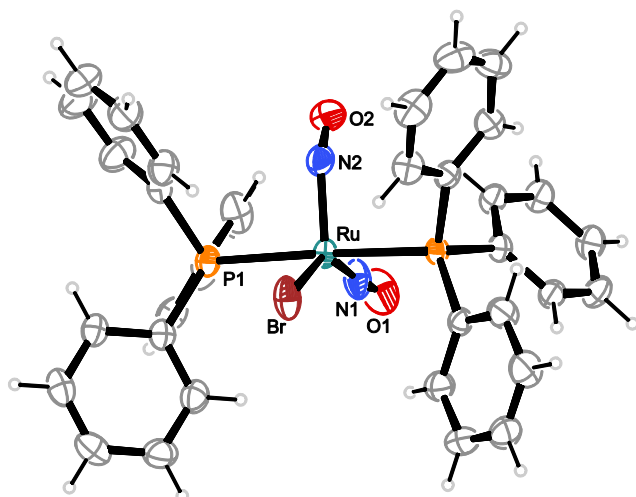

**Fig. S1** Structure of the *vOC*-5-type complex cation  $[\text{RuBr}(\text{NO})_2(\text{PPh}_3)_2]^+$  in crystals of **2**. The thermal ellipsoids are drawn at 50% probability level. Interatomic distances (Å) and angles ( $^\circ$ ), the standard deviation of the last decimal place is given in parentheses: Ru–N1 1.753(2), Ru–N2 1.854(2), Ru–P1 2.4537(6), Ru–P2 2.4470(6), Ru–Br 2.5062(3), O1–N1 1.1352(29), O2–N2 1.148(3); O1–N1–Ru 175.3(3), O2–N2–Ru 143.1(2), N1–Ru–Br 142.03(9), N1–Ru–P1 93.50(7), N1–Ru–P2 92.21(7), N1–Ru–N2 105.75(11), N2–Ru–Br 112.20(7), N2–Ru–P1 90.11(6), N2–Ru–P2 92.59(7), Br–Ru–P1 87.71(2), Br–Ru–P2 85.06(2), P1–Ru–P2 172.78(2). Selected torsion angles: N1–Ru1–N2–O2 4.4(3), Br1–Ru1–N2–O2  $-176.8(3)$ .

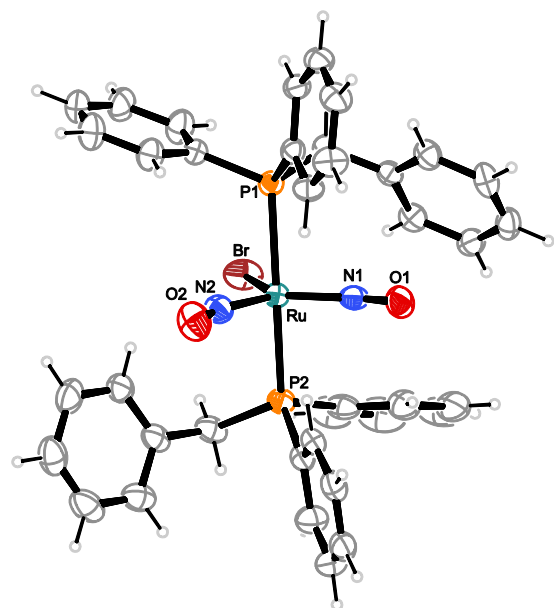

**Fig. S2** Structure of the coordination cation  $[\text{RuBr}(\text{NO})_2(\text{PPh}_2\text{Bn})_2]^+$  in crystals of **4**. The thermal ellipsoids are drawn at 50% probability level. Interatomic distances (Å) and angles ( $^\circ$ ), the standard deviation of the last decimal place is given in parentheses: Ru–N1 1.776(3), Ru–N2 1.781(3), Ru–Br 2.5446(5), Ru–P1 2.4224(9), Ru–P2 2.4225(10), O1–N1 1.153(4),

O2–N2 1.158(4), O1–N1–Ru 168.3(3), O2–N2–Ru 162.4(3), N1–Ru–Br 125.51(11), N1–Ru–P1 93.45(10), N1–Ru–P2 92.06(10), N1–Ru–N2 115.53(15), N2–Ru–Br 118.95(11), N2–Ru–P1 95.96(11), N2–Ru–P2 95.46(11), Br–Ru–P1 81.83(3), Br–Ru–P2 82.49(3), P1–Ru–P2 163.72(3).

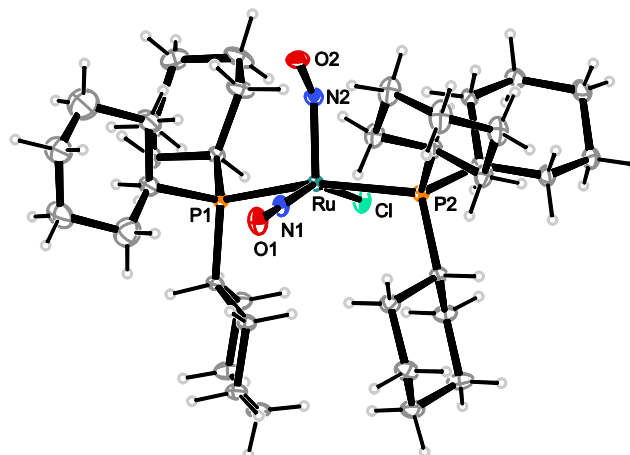

**Fig. S3** Structure of the *vOC*-5-type complex cation  $[\text{RuCl}(\text{NO})_2(\text{PCy}_3)_2]^+$  in crystals of **5**. The thermal ellipsoids are drawn at 50% probability level. Interatomic distances (Å) and angles ( $^\circ$ ), the standard deviation of the last decimal place is given in parentheses: Ru–N1 1.739(3), Ru–N2 1.870(3), Ru–Cl 2.3738(7), Ru–P1 2.4558(8), Ru–P2 2.4792(8), O1–N1 1.162(3), O2–N2 1.159(3), O1–N1–Ru 179.9(3), O2–N2–Ru 136.5(2), N1–Ru–Cl 154.52(9), N1–Ru–P1 92.69(8), N1–Ru–P2 92.11(8), N1–Ru–N2 103.64(12), N2–Ru–Cl 101.80(8), N2–Ru–P1 99.06(8), N2–Ru–P2 95.06(8), Cl–Ru–P1 81.97(3), Cl–Ru–P2 86.98(3), P1–Ru–P2 163.58(3).

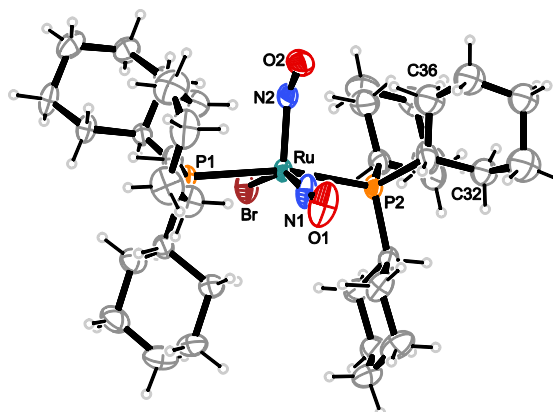

**Fig. S4** Structure of the coordination cation  $[\text{RuBr}(\text{NO})_2(\text{PCy}_3)_2]^+$  in crystals of **6**. The thermal ellipsoids are drawn at 50% probability level. Carbon atoms C32–C36 are disordered, the minor part is not shown (40%). Interatomic distances (Å) and angles ( $^\circ$ ), the standard deviation of the last decimal place is given in parentheses: Ru–N1 1.756(6), Ru–N2 1.846(6), Ru–Br 2.5092(12), Ru–P1 2.4585(17), Ru–P2 2.4769(18), O1–N1 1.120(8), O2–N2 1.151(7), O1–N1–Ru 177.3(6), O2–N2–Ru 139.3(6), N1–Ru–Br 153.0(2), N1–Ru–P1 94.64(18), N1–Ru–P2 89.75(18), N1–Ru–N2 104.1(3), N2–Ru–Br 102.83(19), N2–Ru–P1 96.68(16), N2–Ru–P2 97.16(16), Br–Ru–P1 82.27(5), Br–Ru–P2 86.84(5), P1–Ru–P2 163.99(5). Atoms C32–C36 were refined isotropically.

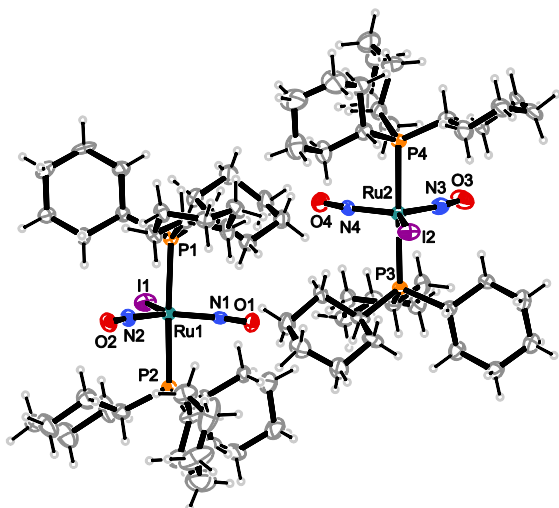

**Fig. S5** Structures of the two crystallographic independent coordination cations  $[\text{Ru}(\text{NO})_2(\text{PCy}_3)_2]^+$  in the asymmetric unit in crystals of **7**. The thermal ellipsoids are drawn at 50% probability level. Interatomic distances ( $\text{\AA}$ ) and angles ( $^\circ$ ), the standard deviation of the last decimal place is given in parentheses: Ru1–N1 1.773(8), Ru1–N2 1.789(9), Ru1–I1 2.7231(10), Ru1–P1 2.475(2), Ru1–P2 2.479(3), O1–N1 1.16(1), O2–N2 1.16(1), O1–N1–Ru1 170.9(8), O2–N2–Ru1 165.9(8), N1–Ru1–I1 121.9(3), N1–Ru1–P1 92.2(2), N1–Ru1–P2 88.1(2), N1–Ru1–N2 122.3(4), N2–Ru1–I1 115.8(3), N2–Ru1–P1 93.9(3), N2–Ru1–P2 93.9(3), I1–Ru1–P1 83.93(6), I1–Ru1–P2 86.71(6), P1–Ru1–P2 169.16(9); Ru2–N3 1.791(9), Ru2–N4 1.790(7), Ru2–I2 2.7301(10), Ru2–P3 2.466(2), Ru2–P4 2.485(3), O3–N3 1.15(1), O4–N4 1.15(1), O3–N3–Ru2 170.3(9), O4–N4–Ru2 163.1(8), N3–Ru2–I2 122.9(3), N3–Ru2–P3 93.0(3), N3–Ru2–P4 92.6(3), N3–Ru2–N4 118.8(4), N4–Ru2–I2 118.3(3), N4–Ru2–P3 94.7(3), N4–Ru2–P4 89.7(3), I2–Ru2–P3 82.56(6), I2–Ru2–P4 87.56(7), P3–Ru2–P4 170.12(9).

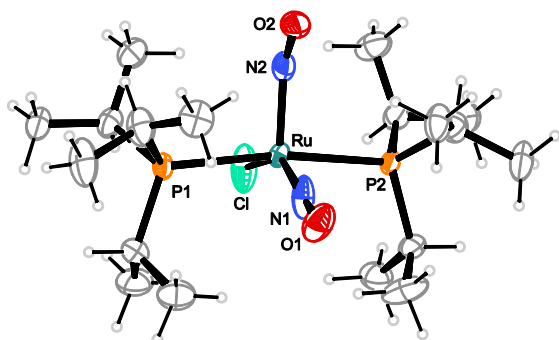

**Fig. S6** Structure of the complex cation  $[\text{RuCl}(\text{NO})_2(\text{P}^i\text{Pr}_3)_2]^+$  in crystals of **11**. The thermal ellipsoids are drawn at 50% probability level. Interatomic distances ( $\text{\AA}$ ) and angles ( $^\circ$ ), the standard deviation of the last decimal place is given in parentheses: Ru–N1 1.740(8), Ru–N2 1.831(8), Ru–Cl 2.380(2), Ru–P1 2.456(2), Ru–P2 2.459(2), O1–N1 1.12(1), O2–N2 1.131(9), O1–N1–Ru 178.0(9), O2–N2–Ru 149.2(8), N1–Ru–Cl 143.7(3), N1–Ru–P1 91.4(2), N1–Ru–P2 91.7(2), N1–Ru–N2 109.0(4), N2–Ru–Cl 107.2(3), N2–Ru–P1 95.6(2), N2–Ru–P2 94.8(2), Cl–Ru–P1 85.88(8), Cl–Ru–P2 84.53(8), P1–Ru–P2 167.53(7).

**Table 1** Crystallographic data for [RuCl(NO)<sub>2</sub>(PPh<sub>3</sub>)<sub>2</sub>]<sub>2</sub>BF<sub>4</sub> (**1**), [RuBr(NO)<sub>2</sub>(PPh<sub>3</sub>)<sub>2</sub>]<sub>2</sub>BF<sub>4</sub> (**2**) and [RuCl(NO)<sub>2</sub>(PPh<sub>2</sub>Bn)<sub>2</sub>]<sub>2</sub>BF<sub>4</sub> (**3**).

| Compound reference                                                            | <b>1</b>                                                                                          | <b>2</b>                                                                                          | <b>3</b> (103K) <sup>a</sup>                                                                      |
|-------------------------------------------------------------------------------|---------------------------------------------------------------------------------------------------|---------------------------------------------------------------------------------------------------|---------------------------------------------------------------------------------------------------|
| Chemical formula                                                              | C <sub>36</sub> H <sub>30</sub> BClF <sub>4</sub> N <sub>2</sub> O <sub>2</sub> P <sub>2</sub> Ru | C <sub>36</sub> H <sub>30</sub> BBrF <sub>4</sub> N <sub>2</sub> O <sub>2</sub> P <sub>2</sub> Ru | C <sub>38</sub> H <sub>34</sub> BClF <sub>4</sub> N <sub>2</sub> O <sub>2</sub> P <sub>2</sub> Ru |
| Formula Mass                                                                  | 807.89                                                                                            | 852.35                                                                                            | 835.94                                                                                            |
| Crystal system                                                                | monoclinic                                                                                        | monoclinic                                                                                        | monoclinic                                                                                        |
| <i>a</i> /Å                                                                   | 19.2204(3)                                                                                        | 19.2932(3)                                                                                        | 12.9469(4)                                                                                        |
| <i>b</i> /Å                                                                   | 9.9060(2)                                                                                         | 9.96620(10)                                                                                       | 20.7987(6)                                                                                        |
| <i>c</i> /Å                                                                   | 20.6933(4)                                                                                        | 20.7107(3)                                                                                        | 13.6465(4)                                                                                        |
| <i>α</i> /°                                                                   | 90.00                                                                                             | 90.00                                                                                             | 90.00                                                                                             |
| <i>β</i> /°                                                                   | 117.6270(10)                                                                                      | 116.9370(10)                                                                                      | 91.274(3)                                                                                         |
| <i>γ</i> /°                                                                   | 90.00                                                                                             | 90.00                                                                                             | 90.00                                                                                             |
| Unit cell volume/Å <sup>3</sup>                                               | 3490.73(11)                                                                                       | 3550.20(8)                                                                                        | 3673.80(19)                                                                                       |
| Temperature/K                                                                 | 173(2)                                                                                            | 173(2)                                                                                            | 103(2)                                                                                            |
| Space group                                                                   | <i>P</i> 2 <sub>1</sub> / <i>c</i>                                                                | <i>P</i> 2 <sub>1</sub> / <i>n</i>                                                                | <i>P</i> 2 <sub>1</sub> / <i>n</i>                                                                |
| No. of formula units per unit cell, <i>Z</i>                                  | 4                                                                                                 | 4                                                                                                 | 4                                                                                                 |
| No. of reflections measured                                                   | 22356                                                                                             | 28118                                                                                             | 21238                                                                                             |
| No. of independent reflections                                                | 7924                                                                                              | 8113                                                                                              | 8425                                                                                              |
| <i>R</i> <sub>int</sub>                                                       | 0.0357                                                                                            | 0.0359                                                                                            | 0.0435                                                                                            |
| Final <i>R</i> <sub><i>i</i></sub> values ( <i>I</i> > 2σ( <i>I</i> ))        | 0.0347                                                                                            | 0.0303                                                                                            | 0.0384                                                                                            |
| Final <i>wR</i> ( <i>F</i> <sup>2</sup> ) values ( <i>I</i> > 2σ( <i>I</i> )) | 0.0726                                                                                            | 0.0684                                                                                            | 0.0908                                                                                            |
| Final <i>R</i> <sub><i>i</i></sub> values (all data)                          | 0.0552                                                                                            | 0.0453                                                                                            | 0.0516                                                                                            |
| Final <i>wR</i> ( <i>F</i> <sup>2</sup> ) values (all data)                   | 0.0809                                                                                            | 0.0745                                                                                            | 0.1009                                                                                            |
| Goodness of fit on <i>F</i> <sup>2</sup>                                      | 1.045                                                                                             | 1.013                                                                                             | 1.060                                                                                             |
| CCDC number                                                                   | 985278                                                                                            | 985280                                                                                            | 985283                                                                                            |

5

**Table 2** Crystallographic data for [RuCl(NO)<sub>2</sub>(PPh<sub>2</sub>Bn)<sub>2</sub>]<sub>2</sub>BF<sub>4</sub> (**3**) at different temperatures.

| Compound reference                                                            | <b>3</b> (153 K)                                                                                  | <b>3</b> (203 K)                                                                                  | <b>3</b> (248 K)                                                                                  | <b>3</b> (293 K)                                                                                  |
|-------------------------------------------------------------------------------|---------------------------------------------------------------------------------------------------|---------------------------------------------------------------------------------------------------|---------------------------------------------------------------------------------------------------|---------------------------------------------------------------------------------------------------|
| Chemical formula                                                              | C <sub>38</sub> H <sub>34</sub> BClF <sub>4</sub> N <sub>2</sub> O <sub>2</sub> P <sub>2</sub> Ru | C <sub>38</sub> H <sub>34</sub> BClF <sub>4</sub> N <sub>2</sub> O <sub>2</sub> P <sub>2</sub> Ru | C <sub>38</sub> H <sub>34</sub> BClF <sub>4</sub> N <sub>2</sub> O <sub>2</sub> P <sub>2</sub> Ru | C <sub>38</sub> H <sub>34</sub> BClF <sub>4</sub> N <sub>2</sub> O <sub>2</sub> P <sub>2</sub> Ru |
| Formula Mass                                                                  | 835.94                                                                                            | 835.94                                                                                            | 835.94                                                                                            | 835.94                                                                                            |
| Crystal system                                                                | monoclinic                                                                                        | monoclinic                                                                                        | monoclinic                                                                                        | monoclinic                                                                                        |
| <i>a</i> /Å                                                                   | 12.9805(4)                                                                                        | 13.0423(4)                                                                                        | 13.1114(9)                                                                                        | 13.1197(13)                                                                                       |
| <i>b</i> /Å                                                                   | 20.8824(7)                                                                                        | 20.9379(8)                                                                                        | 20.9350(16)                                                                                       | 21.006(2)                                                                                         |
| <i>c</i> /Å                                                                   | 13.7090(5)                                                                                        | 13.7807(5)                                                                                        | 13.8377(12)                                                                                       | 13.8668(13)                                                                                       |
| <i>α</i> /°                                                                   | 90.00                                                                                             | 90.00                                                                                             | 90.00                                                                                             | 90.00                                                                                             |
| <i>β</i> /°                                                                   | 91.563(4)                                                                                         | 91.718(3)                                                                                         | 91.974(8)                                                                                         | 91.774(9)                                                                                         |
| <i>γ</i> /°                                                                   | 90.00                                                                                             | 90.00                                                                                             | 90.00                                                                                             | 90.00                                                                                             |
| Unit cell volume/Å <sup>3</sup>                                               | 3714.6(2)                                                                                         | 3761.5(2)                                                                                         | 3796.0(5)                                                                                         | 3819.8(6)                                                                                         |
| Temperature/K                                                                 | 153(2)                                                                                            | 203(2)                                                                                            | 248(2)                                                                                            | 293(2)                                                                                            |
| Space group                                                                   | <i>P</i> 2 <sub>1</sub> / <i>n</i>                                                                |
| No. of formula units per unit cell, <i>Z</i>                                  | 4                                                                                                 | 4                                                                                                 | 4                                                                                                 | 4                                                                                                 |
| No. of reflections measured                                                   | 29144                                                                                             | 24559                                                                                             | 23872                                                                                             | 17610                                                                                             |
| No. of independent reflections                                                | 8618                                                                                              | 12185                                                                                             | 12329                                                                                             | 8667                                                                                              |
| <i>R</i> <sub>int</sub>                                                       | 0.0449                                                                                            | 0.0380                                                                                            | 0.0411                                                                                            | 0.0400                                                                                            |
| Final <i>R</i> <sub><i>i</i></sub> values ( <i>I</i> > 2σ( <i>I</i> ))        | 0.0357                                                                                            | 0.0468                                                                                            | 0.0569                                                                                            | 0.0484                                                                                            |
| Final <i>wR</i> ( <i>F</i> <sup>2</sup> ) values ( <i>I</i> > 2σ( <i>I</i> )) | 0.0815                                                                                            | 0.0880                                                                                            | 0.1114                                                                                            | 0.0970                                                                                            |
| Final <i>R</i> <sub><i>i</i></sub> values (all data)                          | 0.0502                                                                                            | 0.0867                                                                                            | 0.1121                                                                                            | 0.0900                                                                                            |
| Final <i>wR</i> ( <i>F</i> <sup>2</sup> ) values (all data)                   | 0.0915                                                                                            | 0.1084                                                                                            | 0.1443                                                                                            | 0.1237                                                                                            |
| Goodness of fit on <i>F</i> <sup>2</sup>                                      | 1.068                                                                                             | 1.037                                                                                             | 1.043                                                                                             | 1.048                                                                                             |

**Table 3** Crystallographic data for [RuBr(NO)<sub>2</sub>(PPh<sub>2</sub>Bn)<sub>2</sub>]BF<sub>4</sub> (**4**), [RuCl(NO)<sub>2</sub>(PCy<sub>3</sub>)<sub>2</sub>]BF<sub>4</sub> (**5**) [RuBr(NO)<sub>2</sub>(PCy<sub>3</sub>)<sub>2</sub>]BF<sub>4</sub> (**6**).

| Compound reference                                                            | <b>4</b>                                                                                          | <b>5</b>                                                                                          | <b>6</b> · 0.5 H <sub>2</sub> O · EtOH                                                              |
|-------------------------------------------------------------------------------|---------------------------------------------------------------------------------------------------|---------------------------------------------------------------------------------------------------|-----------------------------------------------------------------------------------------------------|
| Chemical formula                                                              | C <sub>38</sub> H <sub>34</sub> BBrF <sub>4</sub> N <sub>2</sub> O <sub>2</sub> P <sub>2</sub> Ru | C <sub>36</sub> H <sub>66</sub> BClF <sub>4</sub> N <sub>2</sub> O <sub>2</sub> P <sub>2</sub> Ru | C <sub>38</sub> H <sub>73</sub> BBrF <sub>4</sub> N <sub>2</sub> O <sub>3.5</sub> P <sub>2</sub> Ru |
| Formula Mass                                                                  | 880.40                                                                                            | 844.18                                                                                            | 943.71                                                                                              |
| Crystal system                                                                | monoclinic                                                                                        | triclinic                                                                                         | triclinic                                                                                           |
| <i>a</i> /Å                                                                   | 13.1175(2)                                                                                        | 10.1237(3)                                                                                        | 10.152(4)                                                                                           |
| <i>b</i> /Å                                                                   | 20.7878(3)                                                                                        | 13.1351(4)                                                                                        | 13.095(5)                                                                                           |
| <i>c</i> /Å                                                                   | 13.6911(2)                                                                                        | 16.2864(4)                                                                                        | 18.857(7)                                                                                           |
| <i>α</i> /°                                                                   | 90.00                                                                                             | 80.7850(10)                                                                                       | 95.262(14)                                                                                          |
| <i>β</i> /°                                                                   | 92.1940(10)                                                                                       | 85.1250(10)                                                                                       | 102.251(18)                                                                                         |
| <i>γ</i> /°                                                                   | 90.00                                                                                             | 68.7460(10)                                                                                       | 109.874(19)                                                                                         |
| Unit cell volume/Å <sup>3</sup>                                               | 3730.61(10)                                                                                       | 1991.49(10)                                                                                       | 2267.0(15)                                                                                          |
| Temperature/K                                                                 | 173(2)                                                                                            | 100(2)                                                                                            | 293(2)                                                                                              |
| Space group                                                                   | <i>P</i> 2 <sub>1</sub> / <i>n</i>                                                                | <i>P</i> -1                                                                                       | <i>P</i> -1                                                                                         |
| No. of formula units per unit cell, <i>Z</i>                                  | 4                                                                                                 | 2                                                                                                 | 2                                                                                                   |
| No. of reflections measured                                                   | 29667                                                                                             | 35930                                                                                             | 60091                                                                                               |
| No. of independent reflections                                                | 8530                                                                                              | 9180                                                                                              | 8641                                                                                                |
| <i>R</i> <sub>int</sub>                                                       | 0.0445                                                                                            | 0.0533                                                                                            | 0.0861                                                                                              |
| Final <i>R</i> <sub>i</sub> values ( <i>I</i> > 2σ( <i>I</i> ))               | 0.0447                                                                                            | 0.0431                                                                                            | 0.0656                                                                                              |
| Final <i>wR</i> ( <i>F</i> <sup>2</sup> ) values ( <i>I</i> > 2σ( <i>I</i> )) | 0.1048                                                                                            | 0.1021                                                                                            | 0.1685                                                                                              |
| Final <i>R</i> <sub>i</sub> values (all data)                                 | 0.0679                                                                                            | 0.0608                                                                                            | 0.0977                                                                                              |
| Final <i>wR</i> ( <i>F</i> <sup>2</sup> ) values (all data)                   | 0.1163                                                                                            | 0.1106                                                                                            | 0.1868                                                                                              |
| Goodness of fit on <i>F</i> <sup>2</sup>                                      | 1.037                                                                                             | 1.042                                                                                             | 1.064                                                                                               |
| CCDC number                                                                   | 985281                                                                                            | 985288                                                                                            | 986284                                                                                              |

**Table 4** Crystallographic data for, [RuI(NO)<sub>2</sub>(PCy<sub>3</sub>)<sub>2</sub>]BF<sub>4</sub> (**7**), [RuCl(NO)<sub>2</sub>(PCyp<sub>3</sub>)<sub>2</sub>]BF<sub>4</sub> (**8**) and [RuBr(NO)<sub>2</sub>(PCyp<sub>3</sub>)<sub>2</sub>]BF<sub>4</sub> (**9**).

| Compound reference                                                            | <b>7</b>                                                                                         | <b>8a</b>                                                                                         | <b>8b</b>                                                                                         | <b>9</b> (113 K) <sup>a</sup>                                                                     |
|-------------------------------------------------------------------------------|--------------------------------------------------------------------------------------------------|---------------------------------------------------------------------------------------------------|---------------------------------------------------------------------------------------------------|---------------------------------------------------------------------------------------------------|
| Chemical formula                                                              | C <sub>36</sub> H <sub>66</sub> BF <sub>4</sub> IN <sub>2</sub> O <sub>2</sub> P <sub>2</sub> Ru | C <sub>30</sub> H <sub>54</sub> BClF <sub>4</sub> N <sub>2</sub> O <sub>2</sub> P <sub>2</sub> Ru | C <sub>30</sub> H <sub>54</sub> BClF <sub>4</sub> N <sub>2</sub> O <sub>2</sub> P <sub>2</sub> Ru | C <sub>30</sub> H <sub>54</sub> BBrF <sub>4</sub> N <sub>2</sub> O <sub>2</sub> P <sub>2</sub> Ru |
| Formula Mass                                                                  | 935.63                                                                                           | 760.02                                                                                            | 760.02                                                                                            | 804.47                                                                                            |
| Crystal system                                                                | orthorhombic                                                                                     | monoclinic                                                                                        | monoclinic                                                                                        | triclinic                                                                                         |
| <i>a</i> /Å                                                                   | 29.645(3)                                                                                        | 14.3483(8)                                                                                        | 12.664(6)                                                                                         | 10.8145(7)                                                                                        |
| <i>b</i> /Å                                                                   | 14.4732(9)                                                                                       | 12.5016(7)                                                                                        | 19.479(9)                                                                                         | 12.3066(9)                                                                                        |
| <i>c</i> /Å                                                                   | 20.678(3)                                                                                        | 19.4893(12)                                                                                       | 14.921(7)                                                                                         | 13.8538(9)                                                                                        |
| <i>α</i> /°                                                                   | 90.00                                                                                            | 90.00                                                                                             | 90.00                                                                                             | 104.889(6)                                                                                        |
| <i>β</i> /°                                                                   | 90.00                                                                                            | 106.688(2)                                                                                        | 111.23(2)                                                                                         | 91.394(5)                                                                                         |
| <i>γ</i> /°                                                                   | 90.00                                                                                            | 90.00                                                                                             | 90.00                                                                                             | 108.105(6)                                                                                        |
| Unit cell volume/Å <sup>3</sup>                                               | 8872.1(17)                                                                                       | 3348.7(3)                                                                                         | 3431(3)                                                                                           | 1682.7(2)                                                                                         |
| Temperature/K                                                                 | 173(2)                                                                                           | 100(2)                                                                                            | 293(2)                                                                                            | 113(2)                                                                                            |
| Space group                                                                   | <i>Pca</i> 2 <sub>1</sub>                                                                        | <i>P</i> 2 <sub>1</sub> / <i>c</i>                                                                | <i>P</i> 2 <sub>1</sub> / <i>n</i>                                                                | <i>P</i> -1                                                                                       |
| No. of formula units per unit cell, <i>Z</i>                                  | 8                                                                                                | 4                                                                                                 | 4                                                                                                 | 2                                                                                                 |
| No. of reflections measured                                                   | 29769                                                                                            | 126341                                                                                            | 77101                                                                                             | 7909                                                                                              |
| No. of independent reflections                                                | 11453                                                                                            | 9061                                                                                              | 7892                                                                                              | 5780                                                                                              |
| <i>R</i> <sub>int</sub>                                                       | 0.0402                                                                                           | 0.0634                                                                                            | 0.0914                                                                                            | 0.0315                                                                                            |
| Final <i>R</i> <sub>i</sub> values ( <i>I</i> > 2σ( <i>I</i> ))               | 0.0557                                                                                           | 0.0415                                                                                            | 0.0570                                                                                            | 0.0388                                                                                            |
| Final <i>wR</i> ( <i>F</i> <sup>2</sup> ) values ( <i>I</i> > 2σ( <i>I</i> )) | 0.1532                                                                                           | 0.0985                                                                                            | 0.1155                                                                                            | 0.0715                                                                                            |
| Final <i>R</i> <sub>i</sub> values (all data)                                 | 0.0684                                                                                           | 0.0567                                                                                            | 0.1217                                                                                            | 0.0543                                                                                            |
| Final <i>wR</i> ( <i>F</i> <sup>2</sup> ) values (all data)                   | 0.1667                                                                                           | 0.1059                                                                                            | 0.1413                                                                                            | 0.0816                                                                                            |
| Goodness of fit on <i>F</i> <sup>2</sup>                                      | 1.062                                                                                            | 1.052                                                                                             | 1.020                                                                                             | 1.060                                                                                             |
| CCDC number                                                                   | 986283                                                                                           | 985289                                                                                            | 985285                                                                                            | 985284                                                                                            |



**Table 5** Crystallographic data for [RuBr(NO)<sub>2</sub>(PCyp<sub>3</sub>)<sub>2</sub>]<sub>2</sub>BF<sub>4</sub> (**9**) at different temperatures.

|                                                                               | <b>9</b> (153 K)                                                                                   | <b>9</b> (193 K)                                                                                   | <b>9</b> (233 K)                                                                                   | <b>9</b> (273 K)                                                                                   |
|-------------------------------------------------------------------------------|----------------------------------------------------------------------------------------------------|----------------------------------------------------------------------------------------------------|----------------------------------------------------------------------------------------------------|----------------------------------------------------------------------------------------------------|
| Compound reference                                                            | <b>9</b> (153 K)                                                                                   | <b>9</b> (193 K)                                                                                   | <b>9</b> (233 K)                                                                                   | <b>9</b> (273 K)                                                                                   |
| Chemical formula                                                              | C <sub>30</sub> H <sub>54</sub> BBBrF <sub>4</sub> N <sub>2</sub> O <sub>2</sub> P <sub>2</sub> Ru | C <sub>30</sub> H <sub>54</sub> BBBrF <sub>4</sub> N <sub>2</sub> O <sub>2</sub> P <sub>2</sub> Ru | C <sub>30</sub> H <sub>54</sub> BBBrF <sub>4</sub> N <sub>2</sub> O <sub>2</sub> P <sub>2</sub> Ru | C <sub>30</sub> H <sub>54</sub> BBBrF <sub>4</sub> N <sub>2</sub> O <sub>2</sub> P <sub>2</sub> Ru |
| Formula Mass                                                                  | 804.47                                                                                             | 804.47                                                                                             | 804.47                                                                                             | 804.47                                                                                             |
| Crystal system                                                                | triclinic                                                                                          | triclinic                                                                                          | triclinic                                                                                          | triclinic                                                                                          |
| <i>a</i> /Å                                                                   | 10.7881(7)                                                                                         | 10.6634(6)                                                                                         | 10.6061(5)                                                                                         | 10.5646(5)                                                                                         |
| <i>b</i> /Å                                                                   | 12.3342(9)                                                                                         | 12.3972(8)                                                                                         | 12.4576(7)                                                                                         | 12.4979(7)                                                                                         |
| <i>c</i> /Å                                                                   | 13.8933(9)                                                                                         | 14.0285(8)                                                                                         | 14.1425(9)                                                                                         | 14.1969(8)                                                                                         |
| <i>α</i> /°                                                                   | 104.916(6)                                                                                         | 104.851(5)                                                                                         | 104.826(5)                                                                                         | 104.825(5)                                                                                         |
| <i>β</i> /°                                                                   | 91.354(6)                                                                                          | 91.200(5)                                                                                          | 91.111(4)                                                                                          | 90.938(4)                                                                                          |
| <i>γ</i> /°                                                                   | 107.901(6)                                                                                         | 107.314(5)                                                                                         | 106.940(4)                                                                                         | 106.823(4)                                                                                         |
| Unit cell volume/Å <sup>3</sup>                                               | 1689.3(2)                                                                                          | 1701.80(17)                                                                                        | 1719.06(16)                                                                                        | 1726.24(15)                                                                                        |
| Temperature/K                                                                 | 153(2)                                                                                             | 193(2)                                                                                             | 233(2)                                                                                             | 273(2)                                                                                             |
| Space group                                                                   | <i>P</i> -1                                                                                        | <i>P</i> -1                                                                                        | <i>P</i> -1                                                                                        | <i>P</i> -1                                                                                        |
| No. of formula units per unit cell, <i>Z</i>                                  | 2                                                                                                  | 2                                                                                                  | 2                                                                                                  | 2                                                                                                  |
| No. of reflections measured                                                   | 8660                                                                                               | 8635                                                                                               | 9397                                                                                               | 9186                                                                                               |
| No. of independent reflections                                                | 6102                                                                                               | 6138                                                                                               | 5330                                                                                               | 6255                                                                                               |
| <i>R</i> <sub>int</sub>                                                       | 0.0317                                                                                             | 0.0241                                                                                             | 0.0268                                                                                             | 0.0220                                                                                             |
| Final <i>R</i> <sub>i</sub> values ( <i>I</i> > 2σ( <i>I</i> ))               | 0.0407                                                                                             | 0.0525                                                                                             | 0.0496                                                                                             | 0.0463                                                                                             |
| Final <i>wR</i> ( <i>F</i> <sup>2</sup> ) values ( <i>I</i> > 2σ( <i>I</i> )) | 0.0790                                                                                             | 0.1174                                                                                             | 0.1131                                                                                             | 0.1121                                                                                             |
| Final <i>R</i> <sub>i</sub> values (all data)                                 | 0.0592                                                                                             | 0.0655                                                                                             | 0.0609                                                                                             | 0.0566                                                                                             |
| Final <i>wR</i> ( <i>F</i> <sup>2</sup> ) values (all data)                   | 0.0919                                                                                             | 0.1288                                                                                             | 0.1224                                                                                             | 0.1207                                                                                             |
| Goodness of fit on <i>F</i> <sup>2</sup>                                      | 1.039                                                                                              | 1.029                                                                                              | 1.035                                                                                              | 1.037                                                                                              |

**Table 6** Crystallographic data for [Ru(NO)<sub>2</sub>(PCyp<sub>3</sub>)<sub>2</sub>]<sub>2</sub>BF<sub>4</sub> (**10**), [RuCl(NO)<sub>2</sub>(P<sup>*i*</sup>Pr<sub>3</sub>)<sub>2</sub>]<sub>2</sub>BF<sub>4</sub> (**11**) and [RuBr(NO)<sub>2</sub>(P<sup>*i*</sup>Pr<sub>3</sub>)<sub>2</sub>]<sub>2</sub>BF<sub>4</sub> (**12**).

|                                                                               | <b>10</b>                                                                                        | <b>11</b>                                                                                         | <b>12</b>                                                                                          |
|-------------------------------------------------------------------------------|--------------------------------------------------------------------------------------------------|---------------------------------------------------------------------------------------------------|----------------------------------------------------------------------------------------------------|
| Compound reference                                                            | <b>10</b>                                                                                        | <b>11</b>                                                                                         | <b>12</b>                                                                                          |
| Chemical formula                                                              | C <sub>30</sub> H <sub>54</sub> BF <sub>4</sub> IN <sub>2</sub> O <sub>2</sub> P <sub>2</sub> Ru | C <sub>18</sub> H <sub>42</sub> BClF <sub>4</sub> N <sub>2</sub> O <sub>2</sub> P <sub>2</sub> Ru | C <sub>18</sub> H <sub>42</sub> BBBrF <sub>4</sub> N <sub>2</sub> O <sub>2</sub> P <sub>2</sub> Ru |
| Formula Mass                                                                  | 851.47                                                                                           | 603.81                                                                                            | 648.27                                                                                             |
| Crystal system                                                                | triclinic                                                                                        | triclinic                                                                                         | monoclinic                                                                                         |
| <i>a</i> /Å                                                                   | 10.4351(3)                                                                                       | 8.0664(6)                                                                                         | 25.5181(9)                                                                                         |
| <i>b</i> /Å                                                                   | 12.4604(4)                                                                                       | 12.7931(9)                                                                                        | 15.9734(6)                                                                                         |
| <i>c</i> /Å                                                                   | 14.3846(4)                                                                                       | 14.3849(11)                                                                                       | 14.3915(5)                                                                                         |
| <i>α</i> /°                                                                   | 105.9226(12)                                                                                     | 114.416(4)                                                                                        | 90.00                                                                                              |
| <i>β</i> /°                                                                   | 90.8080(13)                                                                                      | 91.746(5)                                                                                         | 115.204(2)                                                                                         |
| <i>γ</i> /°                                                                   | 106.6948(13)                                                                                     | 91.295(5)                                                                                         | 90.00                                                                                              |
| Unit cell volume/Å <sup>3</sup>                                               | 1714.00(9)                                                                                       | 1350.04(17)                                                                                       | 5307.7(3)                                                                                          |
| Temperature/K                                                                 | 200(2)                                                                                           | 100(2)                                                                                            | 100(2)                                                                                             |
| Space group                                                                   | <i>P</i> -1                                                                                      | <i>P</i> -1                                                                                       | <i>C</i> 2/ <i>c</i>                                                                               |
| No. of formula units per unit cell, <i>Z</i>                                  | 2                                                                                                | 2                                                                                                 | 8                                                                                                  |
| No. of reflections measured                                                   | 31009                                                                                            | 42763                                                                                             | 43688                                                                                              |
| No. of independent reflections                                                | 7837                                                                                             | 4583                                                                                              | 6131                                                                                               |
| <i>R</i> <sub>int</sub>                                                       | 0.0272                                                                                           | 0.0964                                                                                            | 0.0697                                                                                             |
| Final <i>R</i> <sub>i</sub> values ( <i>I</i> > 2σ( <i>I</i> ))               | 0.0474                                                                                           | 0.0724                                                                                            | 0.0393                                                                                             |
| Final <i>wR</i> ( <i>F</i> <sup>2</sup> ) values ( <i>I</i> > 2σ( <i>I</i> )) | 0.1136                                                                                           | 0.1837                                                                                            | 0.0878                                                                                             |
| Final <i>R</i> <sub>i</sub> values (all data)                                 | 0.0600                                                                                           | 0.1002                                                                                            | 0.0555                                                                                             |
| Final <i>wR</i> ( <i>F</i> <sup>2</sup> ) values (all data)                   | 0.1229                                                                                           | 0.2042                                                                                            | 0.0949                                                                                             |
| Goodness of fit on <i>F</i> <sup>2</sup>                                      | 1.050                                                                                            | 1.059                                                                                             | 1.046                                                                                              |
| CCDC number                                                                   | 985286                                                                                           | 985279                                                                                            | 985287                                                                                             |

**Table 7**  $\tau_5$  values and continuous shape measures (CShM; the value closest to the respective conformer is printed boldface).

|            | PR <sub>3</sub> /X                 | $\tau_5$ -value |       | CShM(exp.)    |                |               | CShM(calc.)   |                |               |
|------------|------------------------------------|-----------------|-------|---------------|----------------|---------------|---------------|----------------|---------------|
|            |                                    | exp.            | calc. | <i>vOC</i> -5 | <i>TBPY</i> -5 | <i>SPY</i> -5 | <i>vOC</i> -5 | <i>TBPY</i> -5 | <i>SPY</i> -5 |
| <b>1</b>   | PPh <sub>3</sub> /Cl               | 0.36            | 0.30  | 2.118         | 4.428          | 2.500         | <b>2.588</b>  | 3.899          | 3.613         |
| <b>2</b>   | PPh <sub>3</sub> /Br               | 0.51            | 0.41  | 2.849         | 3.616          | 3.035         | 3.730         | <b>3.096</b>   | 4.312         |
| <b>3</b>   | PPh <sub>2</sub> Bn/Cl             | 0.65            | 0.64  | 6.041         | 1.958          | 5.170         | 5.464         | <b>2.124</b>   | 4.616         |
| <b>4</b>   | PPh <sub>2</sub> Bn/Br             | 0.64            | 0.68  | 5.792         | 1.976          | 5.060         | 5.419         | <b>2.153</b>   | 4.618         |
| <b>5</b>   | PCy <sub>3</sub> /Cl               | 0.15            | 0.21  | 2.101         | 4.829          | 2.517         | <b>1.804</b>  | 2.292          | 2.292         |
| <b>6</b>   | PCy <sub>3</sub> /Br               | 0.19            | 0.16  | 1.891         | 5.369          | 2.337         | <b>1.851</b>  | 5.325          | 2.383         |
| <b>7a</b>  | PCy <sub>3</sub> /I                | 0.79            | 0.76  | 6.547         | 2.247          | 6.000         | 6.205         | <b>2.110</b>   | 5.467         |
| <b>7b</b>  | PCy <sub>3</sub> /I                | 0.78            | 0.76  | 6.547         | 2.247          | 6.000         | 6.731         | <b>2.193</b>   | 6.360         |
| <b>8a</b>  | PCyp <sub>3</sub> /Cl              | 0.09            | 0.10  | 1.666         | 5.923          | 2.213         | <b>1.555</b>  | 6.236          | 2.167         |
| <b>8b</b>  | PCyp <sub>3</sub> /Cl              | 0.68            | 0.71  | 5.778         | 2.242          | 5.224         | 5.495         | <b>2.075</b>   | 4.518         |
| <b>9</b>   | PCyp <sub>3</sub> /Br              | 0.66            | 0.63  | 6.078         | 2.327          | 5.369         | 5.618         | <b>2.023</b>   | 4.955         |
| <b>10</b>  | PCyp <sub>3</sub> /I               | 0.65            | 0.68  | 5.832         | 2.430          | 5.302         | 4.941         | <b>2.464</b>   | 4.518         |
| <b>11</b>  | P <sup>t</sup> Pr <sub>3</sub> /Cl | 0.26            | 0.27  | 2.325         | 4.493          | 2.714         | <b>2.170</b>  | 4.590          | 2.454         |
| <b>12a</b> | P <sup>t</sup> Pr <sub>3</sub> /Br | 0.09            | 0.11  | 1.689         | 6.138          | 2.135         | <b>1.999</b>  | 6.638          | 2.400         |
| <b>12b</b> | P <sup>t</sup> Pr <sub>3</sub> /Br | 0.69            | 0.68  | 6.558         | 2.244          | 5.756         | 6.518         | <b>2.303</b>   | 4.975         |

## Experimental Section (standard procedures)

### Mass spectrometry

Mass spectra were recorded on a Thermo Finnigan MAT 95 (FAB) and Thermo Finnigan LTQ FT with IonMax (ion source with ESI head). The highest measured value of a molecule peak can deviate from the calculated one in two mass units, depending on the halide isotope measured.

### IR spectroscopy at room temperature

Measurements of IR spectra were performed using a Jasco FT/IR-460 plus device equipped with a single reflection ATR diamond plate (solid samples). Liquid samples were measured within an NaCl cell.

### NMR spectroscopy

NMR spectra were recorded at room temperature on Jeol Eclipse 270 ( $^1\text{H}$ : 270 MHz,  $^{31}\text{P}$ : 109 MHz).

### Crystal structure determination and refinement

Crystals suitable for single-crystal X-ray diffraction were selected with the aid of a polarisation microscope. For subsequent measurement the crystals were mounted on either the tip of a glass fibre, a micro mount or a loop and investigated on a Nonius KappaCCD, an Oxford XCalibur, a Bruker d8Venture or a Bruker d8Quest. All X-ray devices worked with graphite-monochromated  $\text{MoK}\alpha$  radiation ( $\lambda = 0.71073 \text{ \AA}$ ). The structures were solved by either direct or Patterson methods (SHELXS-97) and refined by full-matrix least-squares calculations on  $F^2$  (SHELXL-97).<sup>1</sup> Anisotropic displacement parameters were refined for all non-hydrogen atoms. Structure plots were made using ORTEP; thermal ellipsoids are drawn at 50% probability except otherwise stated.<sup>2</sup> For the distances and angles given in the captions of the structure plots, the standard deviation of the last decimal is given in parentheses. Crystallographic data are listed in the supplementary information.

- 1 G. Sheldrick, *Acta Crystallogr., Sect. A.*, 2008, **64**, 112–122.
- 2 L. Farrugia, *J. Appl. Crystallogr.*, 1997, **30**, 565.
